# Supplementary material for: High expression of ETS2 predicts poor prognosis in acute myeloid leukemia and may guide treatment decisions
Source: Springer Nature journal article supplement (doi:10.1186/s12967-017-1260-2), 2017-07-19
Supplement: MOESM1 [file 13314922]

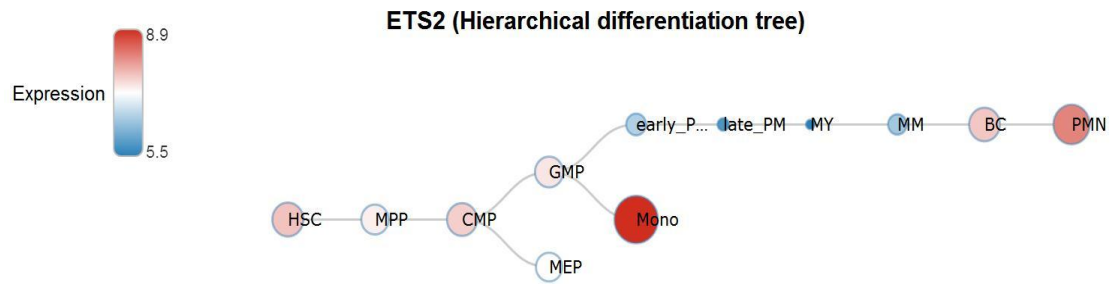

**Figure S1.** The hierarchical differentiation tree of relationship between ETS2 expression level and hematopoietic cell differentiation. HSC: Hematopoietic stem cell; MPP: Multipotential progenitors; CMP: Common myeloid progenitor cell; GMP: Granulocyte monocyte progenitors; MEP: Megakaryocyte-erythroid progenitor cell; early-PM: Early Promyelocyte; late-PM: Late Promyelocyte; MY: Myelocyte; MM: Metamyelocytes; BC: Band cell; PMN: Polymorphonuclear cells; Mono: Monocytes.
